# Supplementary material for: Vitiligo blood transcriptomics provides new insights into disease mechanisms and identifies potential novel therapeutic targets
Source: PubMed Central journal article supplement (PMC5273810; doi:10.1186/s12864-017-3510-3), 2017-01-28
Supplement: 12864_2017_3510_MOESM1_ESM.pdf [file 12864_2017_3510_MOESM1_ESM.pdf]

| GO #      | Biological Processes                                               | Count | Fold Enrichment | p-value  |
|-----------|--------------------------------------------------------------------|-------|-----------------|----------|
| * 0006955 | immune response                                                    | 61    | 4.4             | 1.27E-22 |
| * 0001775 | cell activation                                                    | 25    | 4.3             | 3.9E-09  |
| * 0009615 | response to virus                                                  | 16    | 7.2             | 4.75E-09 |
| 0045321   | leukocyte activation                                               | 22    | 4.5             | 2E-08    |
| 0002521   | leukocyte differentiation                                          | 15    | 5.7             | 3.96E-07 |
| * 0002684 | positive regulation of immune system process                       | 19    | 3.9             | 1.6E-06  |
| 0051249   | regulation of lymphocyte activation                                | 15    | 5.0             | 1.75E-06 |
| 0002520   | immune system development                                          | 20    | 3.6             | 3.35E-06 |
| 0048534   | hemopoietic or lymphoid organ development                          | 19    | 3.6             | 5.59E-06 |
| * 0006952 | defense response                                                   | 31    | 2.5             | 6.97E-06 |
| 0050865   | regulation of cell activation                                      | 15    | 4.2             | 1.25E-05 |
| 0007242   | intracellular signaling cascade                                    | 48    | 1.9             | 2.33E-05 |
| 0006954   | inflammatory response                                              | 20    | 3.0             | 3.36E-05 |
| 0002757   | immune response-activating signal transduction                     | 8     | 7.6             | 7.77E-05 |
| 0002252   | immune effector process                                            | 12    | 4.4             | 8.47E-05 |
| 0030097   | hemopoiesis                                                        | 16    | 3.3             | 9.05E-05 |
| 0002429   | immune response-activating cell surface receptor signaling pathway | 7     | 8.9             | 0.000119 |
| 0002764   | immune response-regulating signal transduction                     | 8     | 7.1             | 0.000126 |
| * 0050863 | regulation of T cell activation                                    | 11    | 4.6             | 0.000127 |
| 0002768   | immune response-regulating cell surface receptor signaling pathway | 7     | 8.2             | 0.000182 |

**Additional File 1: Table S1. Potential disease relevant GO biological processes associated with down-regulated genes discovered by unsupervised hierarchical clustering.** Unbiased analysis was able to use the most variably expressed genes (see Materials and Methods) from the peripheral blood of 8 VL patients and 6 healthy control individuals and cluster them into a distinct signature based upon “disease state”. From the total of 1346 variable genes included in this analysis, a group of 319 were subsequently revealed to be down-regulated in VL patients. Functional annotation of the down-regulated genes by DAVID revealed enrichment in gene ontology (GO) biological processes that have previously been implicated in the clinical setting of VL. **Count**, # of DEGS in the list involved in the specific biological process. Starred\* biological processes are shared with biological processes enriched in the 99 differentially expressed genes (DEGs) obtained subsequently from comparing the two groups of samples.

**Running title:** VL-blood transcriptomics identifies potential novel therapeutic targets. **Dey-Rao and Sinha 2016**
