# Supplementary material for: Vitiligo blood transcriptomics provides new insights into disease mechanisms and identifies potential novel therapeutic targets
Source: PubMed Central journal article supplement (PMC5273810; doi:10.1186/s12864-017-3510-3), 2017-01-28
Supplement: 12864_2017_3510_MOESM2_ESM.pdf [file 12864_2017_3510_MOESM2_ESM.pdf]

| <b>Entrez Gene</b> | <b>Gene Symbol</b> | <b>Chrom Location</b> | <b>Gene Title</b>                                                | <b>p-value</b> | <b>Fold-Change (Vitiligo vs. Control)</b> |
|--------------------|--------------------|-----------------------|------------------------------------------------------------------|----------------|-------------------------------------------|
| 23                 | ABCF1              | chr6p21.33            | ATP-binding cassette, sub-family F (GCN20), member 1             | 0.0361         | -1.4                                      |
| 262                | AMD1               | chr6q21               | adenosylmethionine decarboxylase 1                               | 0.0192         | -1.6                                      |
| 23253              | ANKRD12            | chr18p11.22           | ankyrin repeat domain 12                                         | 0.0236         | 1.4                                       |
| 311                | ANXA11             | chr10q23              | annexin A11                                                      | 0.0485         | -1.4                                      |
| 11119              | BTN3A1             | chr6p22.1             | butyrophilin, subfamily 3, member A1                             | 0.0453         | -1.5                                      |
| 22794              | CASC3              | chr17q21.1            | cancer susceptibility candidate 3                                | 0.0269         | -1.5                                      |
| 1236               | CCR7               | chr17q12-q21.2        | chemokine (C-C motif) receptor 7                                 | 0.0472         | -2.1                                      |
| 5218               | CDK14              | chr7q21-q22           | cyclin-dependent kinase 14                                       | 0.0197         | -1.5                                      |
| 8760               | CDS2               | chr20p13              | CDP-diacylglycerol synthase (phosphatidate cytidyltransferase) 2 | 0.0314         | -1.5                                      |
| 27243              | CHMP2A             | chr19q                | charged multivesicular body protein 2A                           | 0.0409         | -1.9                                      |
| 91782              | CHMP7              | chr8p21.3             | charged multivesicular body protein 7                            | 0.0237         | -1.5                                      |
| 11316              | COPE               | chr19p13.11           | coatamer protein complex, subunit epsilon                        | 0.0142         | -1.5                                      |
| 10404              | CPQ                | chr8q22.2             | carboxypeptidase Q                                               | 0.0221         | -1.6                                      |
| 1545               | CYP1B1             | chr2p22.2             | cytochrome P450, family 1, subfamily B, polypeptide 1            | 0.0069         | 1.4                                       |
| 1577               | CYP3A5             | chr7q21.1             | cytochrome P450, family 3, subfamily A, polypeptide 5            | 0.0315         | 1.5                                       |
| 9416               | DDX23              | chr12q13.12           | DEAD (Asp-Glu-Ala-Asp) box polypeptide 23                        | 0.0233         | -1.5                                      |
| 1796               | DOK1               | chr2p13               | docking protein 1, 62kDa (downstream of tyrosine kinase 1)       | 0.0428         | -1.5                                      |

|       |           |                 |                                                                                         |        |      |
|-------|-----------|-----------------|-----------------------------------------------------------------------------------------|--------|------|
| 5610  | EIF2AK2   | chr2p22-p21     | eukaryotic translation initiation factor 2-alpha kinase 2                               | 0.0107 | -1.7 |
| 2000  | ELF4      | chrXq26         | E74-like factor 4 (ets domain transcription factor)                                     | 0.0363 | -1.7 |
| 2201  | FBN2      | chr5q23-q31     | fibrillin 2                                                                             | 0.0346 | 1.5  |
| 2209  | FCGR1A    | chr1q21.2-q21.3 | Fc fragment of IgG, high affinity Ia, receptor (CD64) /// Fc fragment of IgG, high affi | 0.0067 | -2.7 |
| 2213  | FCGR2B    | chr1q23         | Fc fragment of IgG, low affinity IIb, receptor (CD32)                                   | 0.0429 | -1.4 |
| 2319  | FLOT2     | chr17q11-q12    | flotillin 2                                                                             | 0.0345 | -1.6 |
| 3087  | HHEX      | chr10q23.33     | hematopoietically expressed homeobox                                                    | 0.0469 | -1.5 |
| 3017  | HIST1H2BD | chr6p21.3       | histone cluster 1, H2bd                                                                 | 0.0128 | -1.9 |
| 3159  | HMGA1     | chr6p21         | high mobility group AT-hook 1                                                           | 0.0340 | -1.4 |
| 10561 | IFI44     | chr1p31.1       | interferon-induced protein 44                                                           | 0.0221 | -2.2 |
| 10964 | IFI44L    | chr1p31.1       | interferon-induced protein 44-like                                                      | 0.0284 | -3.6 |
| 3434  | IFIT1     | chr10q23.31     | interferon-induced protein with tetratricopeptide repeats 1                             | 0.0169 | -4.0 |
| 3437  | IFIT3     | chr10q24        | interferon-induced protein with tetratricopeptide repeats 3                             | 0.0134 | -3.5 |
| 10581 | IFITM2    | chr11p15.5      | interferon induced transmembrane protein 2                                              | 0.0342 | -2.7 |
| 10379 | IRF9      | chr14q11.2      | interferon regulatory factor 9                                                          | 0.0049 | -1.7 |
| 9636  | ISG15     | chr1p36.33      | ISG15 ubiquitin-like modifier                                                           | 0.0173 | -4.2 |
| 3669  | ISG20     | chr15q26        | interferon stimulated exonuclease gene 20kDa                                            | 0.0225 | -2.2 |

|        |        |              |                                                                                    |        |      |
|--------|--------|--------------|------------------------------------------------------------------------------------|--------|------|
| 3720   | JARID2 | chr6p24-p23  | jumonji, AT rich interactive domain 2                                              | 0.0296 | -1.6 |
| 7994   | KAT6A  | chr8p11      | K(lysine) acetyltransferase 6A                                                     | 0.0461 | -1.8 |
| 3772   | KCNJ15 | chr21q22.2   | potassium inwardly-rectifying channel, subfamily J, member 15                      | 0.0119 | -1.9 |
| 22992  | KDM2A  | chr11q13.2   | lysine (K)-specific demethylase 2A                                                 | 0.0482 | -1.6 |
| 9903   | KLHL21 | chr1p36.31   | kelch-like family member 21                                                        | 0.0268 | -1.4 |
| 3934   | LCN2   | chr9q34      | lipocalin 2                                                                        | 0.0244 | -1.4 |
| 3965   | LGALS9 | chr17q11.2   | lectin, galactoside-binding, soluble, 9                                            | 0.0125 | -1.9 |
| 57149  | LYRM1  | chr16p11.2   | LYR motif containing 1                                                             | 0.0280 | -1.5 |
| 6885   | MAP3K7 | chr6q15      | mitogen-activated protein kinase kinase kinase 7                                   | 0.0334 | -1.5 |
| 23383  | MAU2   | chr19p13.11  | MAU2 chromatid cohesion factor homolog ( <i>C. elegans</i> )                       | 0.0338 | -1.5 |
| 79143  | MBOAT7 | chr19q13.4   | membrane bound O-acyltransferase domain containing 7                               | 0.0382 | -1.8 |
| 9968   | MED12  | chrXq13      | mediator complex subunit 12                                                        | 0.0218 | -1.5 |
| 4236   | MFAP1  | chr15q15-q21 | microfibrillar-associated protein 1                                                | 0.0380 | -1.6 |
| 4277   | MICB   | chr6p21.3    | MHC class I polypeptide-related sequence B                                         | 0.0085 | -3.3 |
| 4489   | MT1A   | chr16q13     | metallothionein 1A                                                                 | 0.0001 | -1.7 |
| 4599   | MX1    | chr21q22.3   | myxovirus (influenza virus) resistance 1, interferon-inducible protein p78 (mouse) | 0.0099 | -3.5 |
| 4600   | MX2    | chr21q22.3   | myxovirus (influenza virus) resistance 2 (mouse)                                   | 0.0193 | -2.2 |
| 653361 | NCF1   | chr7q11.23   | neutrophil cytosolic factor 1                                                      | 0.0436 | -2.7 |
| 4689   | NCF4   | chr22q13.1   | neutrophil cytosolic factor 4, 40kDa                                               | 0.0389 | -1.8 |

|       |         |               |                                                                                         |        |      |
|-------|---------|---------------|-----------------------------------------------------------------------------------------|--------|------|
| 8440  | NCK2    | chr2q12       | NCK adaptor protein 2                                                                   | 0.0065 | -1.8 |
| 4738  | NEDD8   | chr14q12      | neural precursor cell expressed, developmentally down-regulated 8                       | 0.0173 | -1.5 |
| 4791  | NFKB2   | chr10q24      | nuclear factor of kappa light polypeptide gene enhancer in B-cells 2 (p49/p100)         | 0.0206 | -1.5 |
| 25936 | NSL1    | chr1q41       | NSL1, MIND kinetochore complex component, homolog ( <i>S. cerevisiae</i> )              | 0.0249 | -1.6 |
| 8638  | OASL    | chr12q24.2    | 2'-5'-oligoadenylate synthetase-like                                                    | 0.0334 | -2.7 |
| 9934  | P2RY14  | chr3q24-q25.1 | purinergic receptor P2Y, G-protein coupled, 14                                          | 0.0105 | -1.6 |
| 5279  | PIGC    | chr1q23-q25   | uncharacterized LOC100505991 /// phosphatidylinositol glycan anchor biosynthesis, class | 0.0256 | -1.6 |
| 11040 | PIM2    | chrXp11.23    | pim-2 oncogene                                                                          | 0.0103 | -1.5 |
| 5359  | PLSCR1  | chr3q23       | phospholipid scramblase 1                                                               | 0.0149 | -2.1 |
| 6992  | PPP1R11 | chr6p21.3     | protein phosphatase 1, regulatory (inhibitor) subunit 11                                | 0.0402 | -1.5 |
| 5524  | PPP2R4  | chr9q34       | protein phosphatase 2A activator, regulatory subunit 4                                  | 0.0367 | -1.5 |
| 5580  | PRKCD   | chr3p21.31    | protein kinase C, delta                                                                 | 0.0318 | -1.7 |
| 23550 | PSD4    | chr2q13       | pleckstrin and Sec7 domain containing 4                                                 | 0.0069 | -1.6 |
| 5696  | PSMB8   | chr6p21.3     | proteasome (prosome, macropain) subunit, beta type, 8                                   | 0.0210 | -1.6 |
| 5698  | PSMB9   | chr6p21.3     | proteasome (prosome, macropain) subunit, beta type, 9                                   | 0.0421 | -1.7 |
| 5777  | PTPN6   | chr12p13      | protein tyrosine phosphatase, non-receptor type 6                                       | 0.0302 | -1.9 |

|       |          |                  |                                                                                         |        |      |
|-------|----------|------------------|-----------------------------------------------------------------------------------------|--------|------|
| 23369 | PUM2     | chr2p22-p21      | pumilio homolog 2 (Drosophila)                                                          | 0.0406 | -1.6 |
| 9910  | RABGAP1L | chr1q24          | RAB GTPase activating protein 1-like                                                    | 0.0403 | -1.7 |
| 23108 | RAP1GAP2 | chr17p13.3       | RAP1 GTPase activating protein 2                                                        | 0.0113 | -1.5 |
| 6210  | RPS15A   | chr16p           | ribosomal protein S15a                                                                  | 0.0368 | -1.8 |
| 91543 | RSAD2    | chr2p25.2        | radical S-adenosyl methionine domain containing 2                                       | 0.0487 | -2.1 |
| 9554  | SEC22B   | chr1q21.1        | vesicle-trafficking protein SEC22b-like /// SEC22 vesicle trafficking protein homolog B | 0.0050 | -1.5 |
| 6402  | SELL     | chr1q23-q25      | selectin L                                                                              | 0.0492 | -1.7 |
| 710   | SERPING1 | chr11q12.1       | serpin peptidase inhibitor, clade G (C1 inhibitor), member 1                            | 0.0084 | -4.0 |
| 6672  | SP100    | chr2q37.1        | SP100 nuclear antigen                                                                   | 0.0427 | -1.5 |
| 6689  | SPIB     | chr19q13.3-q13.4 | Spi-B transcription factor (Spi-1/PU.1 related)                                         | 0.0013 | -1.6 |
| 6772  | STAT1    | chr2q32.2        | signal transducer and activator of transcription 1, 91kDa                               | 0.0289 | -2.6 |
| 6778  | STAT6    | chr12q13         | signal transducer and activator of transcription 6, interleukin-4 induced               | 0.0441 | -1.5 |
| 6801  | STRN     | chr2p22.2        | striatin, calmodulin binding protein                                                    | 0.0323 | -1.5 |
| 6827  | SUPT4H1  | chr17q21-q23     | suppressor of Ty 4 homolog 1 (S. cerevisiae)                                            | 0.0306 | -1.5 |
| 6834  | SURF1    | chr9q34.2        | surfeit 1                                                                               | 0.0428 | -1.5 |
| 6850  | SYK      | chr9q22          | spleen tyrosine kinase                                                                  | 0.0323 | -1.7 |
| 6890  | TAP1     | chr6p21.3        | transporter 1, ATP-binding cassette, sub-family B (MDR/TAP)                             | 0.0097 | -1.6 |
| 23435 | TARDBP   | chr1p36.22       | TAR DNA binding protein                                                                 | 0.0453 | -1.7 |

|        |         |                  |                                                          |        |      |
|--------|---------|------------------|----------------------------------------------------------|--------|------|
| 23102  | TBC1D2B | chr15q24.3-q25.1 | TBC1 domain family, member 2B                            | 0.0137 | -1.5 |
| 10953  | TOMM34  | chr20q12-q13.1   | translocase of outer mitochondrial membrane 34           | 0.0371 | -1.6 |
| 9881   | TRANK1  | chr3p22.2        | tetratricopeptide repeat and ankyrin repeat containing 1 | 0.0371 | -2.0 |
| 6737   | TRIM21  | chr11p15.5       | tripartite motif containing 21                           | 0.0058 | -1.6 |
| 9246   | UBE2L6  | chr11q12         | ubiquitin-conjugating enzyme E2L 6                       | 0.0322 | -1.7 |
| 23304  | UBR2    | chr6p21.1        | ubiquitin protein ligase E3 component n-recognin 2       | 0.0461 | -1.4 |
| 23352  | UBR4    | chr1p36.13       | ubiquitin protein ligase E3 component n-recognin 4       | 0.0210 | -1.6 |
| 7357   | UGCG    | chr9q31          | UDP-glucose ceramide glucosyltransferase                 | 0.0014 | -1.9 |
| 147179 | WIPF2   | chr17q21.2       | WAS/WASL interacting protein family, member 2            | 0.0450 | -1.6 |
| 9189   | ZBED1   | chrXp22.33; Yp11 | zinc finger, BED-type containing 1                       | 0.0140 | -1.9 |
| 22882  | ZHX2    | chr8q24.13       | zinc fingers and homeoboxes 2                            | 0.0118 | -1.6 |
| 7572   | ZNF24   | chr18q12         | zinc finger protein 24                                   | 0.0481 | -1.5 |

**Additional File 2: Table S2. Differentially expressed genes in VL peripheral blood transcriptional profile.** Microarray analysis comparing peripheral blood dataset from 8 VL patients 6 healthy controls generated 99 non-redundant differentially expressed genes (DEGs). FC=Fold Change; a “positive” fold change indicates an upregulation and a “negative” fold change indicates a down-regulation in Vitiligo patients vs.healthy control individuals. VL= Vitiligo. Chrom location= chromosomal location.

**Running title:** VL-blood transcriptomics identifies potential novel therapeutic targets. **Dey-Rao and Sinha 2016**
