# Supplementary material for: Vitiligo blood transcriptomics provides new insights into disease mechanisms and identifies potential novel therapeutic targets
Source: PubMed Central journal article supplement (PMC5273810; doi:10.1186/s12864-017-3510-3), 2017-01-28
Supplement: 12864_2017_3510_MOESM3_ESM.pdf [file 12864_2017_3510_MOESM3_ESM.pdf]

| <b>a</b> | <b>KEGG Pathway Term</b>         | <b>Homo sapiens Hsa #</b> | <b>Fold Enrichment</b> | <b>p-value</b> | <b>DEGs</b>                                            |
|----------|----------------------------------|---------------------------|------------------------|----------------|--------------------------------------------------------|
|          | Fc gamma R-mediated phagocytosis | 04666                     | 6.8                    | 0.0051         | <i>FCGR1C, FCGR2B, NCF1, FCGR1A, NCF1C, PRKCD, SYK</i> |
|          | Systemic lupus erythematosus     | 05322                     | 5.2                    | 0.0369         | <i>HIST1H2BD, FCGR1C, FCGR2B, FCGR1A, TRIM21</i>       |

| <b>b</b> | <b>Biological Process Term</b>                   | <b>GO Accession #</b> | <b>Fold Enrichment</b> | <b>p-value</b> | <b>DEGs</b>                                                                                                                                                          |
|----------|--------------------------------------------------|-----------------------|------------------------|----------------|----------------------------------------------------------------------------------------------------------------------------------------------------------------------|
|          | response to virus                                | 0009615               | 17.3                   | 7.00E-11       | <i>LCN2, IRF9, PLSCR1, ISG15, RSAD2, RPS15A, IFI44, MX1, EIF2AK2, STAT1, MX2, ISG20</i>                                                                              |
|          | immune response                                  | 0006955               | 4.6                    | 4.00E-08       | <i>MICB, SP100, IFITM2, NCF1, NCF4, NCF1C, RSAD2, IFI44L, SERPING1, NFKB2, PRKCD, PSMB8, PSMB9, OASL, CCR7, FCGR2B, FCGR1C, FCGR1A, P2RY14, TAP1, ANXA11, FCGR1B</i> |
|          | regulation of immune effector process            | 0002697               | 7.8                    | 4.00E-03       | <i>MAP3K7, STAT6, MICB, SERPING1, SYK</i>                                                                                                                            |
|          | cellular macromolecule catabolic process         | 0044265               | 2.6                    | 6.00E-03       | <i>ISG15, KDM2A, UBR4, ZHX2, UBE2L6, KLHL21, NEDD8, UBR2, CASC3, PSMB8, ISG20, PSMB9</i>                                                                             |
|          | cell activation                                  | 0001775               | 3.8                    | 9.00E-03       | <i>PLSCR1, NCK2, MICB, ELF4, NFKB2, PRKCD, SYK</i>                                                                                                                   |
|          | regulation of cellular protein metabolic process | 0032268               | 3                      | 1.00E-02       | <i>NCK2, PPP2R4, SERPING1, CASC3, PUM2, PRKCD, PSMB8, PSMB9, SYK</i>                                                                                                 |
|          | defense response                                 | 0006952               | 2.6                    | 1.00E-02       | <i>ABCF1, CCR7, SP100, FCGR1C, NCF1, FCGR1A, TAP1, NCF1C, RSAD2,</i>                                                                                                 |

|                                                                    |         |      |          |                                                                                         |
|--------------------------------------------------------------------|---------|------|----------|-----------------------------------------------------------------------------------------|
|                                                                    |         |      |          | <i>SERPING1, MX1, MX2</i>                                                               |
| negative regulation of macromolecule metabolic process             | 0010605 | 2.4  | 2.00E-02 | <i>HHEX, SP100, JARID2, ZHX2, ZNF24, PPP2R4, SERPING1, SUPT4H1, PRKCD, PSMB8, PSMB9</i> |
| positive regulation of immune system process                       | 0002684 | 4    | 2.00E-02 | <i>MAP3K7, STAT6, NCK2, MICB, SERPING1, SYK</i>                                         |
| positive regulation of lymphocyte activation                       | 0051251 | 6.5  | 2.00E-02 | <i>MAP3K7, STAT6, NCK2, SYK</i>                                                         |
| immune response-activating cell surface receptor signaling pathway | 0002429 | 12.1 | 2.00E-02 | <i>MAP3K7, MICB, SYK</i>                                                                |
| negative regulation of response to stimulus                        | 0048585 | 6.3  | 3.00E-02 | <i>STAT6, MICB, SERPING1, PRKCD</i>                                                     |
| negative regulation of cellular protein metabolic process          | 0032269 | 4.4  | 3.00E-02 | <i>PPP2R4, SERPING1, PRKCD, PSMB8, PSMB9</i>                                            |
| modification-dependent protein catabolic process                   | 0019941 | 2.5  | 3.00E-02 | <i>ISG15, KDM2A, UBR4, UBE2L6, KLHL21, NEDD8, UBR2, PSMB8, PSMB9</i>                    |
| immune response-regulating cell surface receptor signaling pathway | 0002768 | 11.2 | 3.00E-02 | <i>MAP3K7, MICB, SYK</i>                                                                |
| positive regulation of leukocyte activation                        | 0002696 | 5.9  | 3.00E-02 | <i>MAP3K7, STAT6, NCK2, SYK</i>                                                         |
| ISG15-protein conjugation                                          | 0032020 | 62.9 | 3.00E-02 | <i>ISG15, UBE2L6</i>                                                                    |
| positive regulation of cell activation                             | 0050867 | 5.7  | 3.00E-02 | <i>MAP3K7, STAT6, NCK2, SYK</i>                                                         |
| proteolysis involved in cellular protein catabolic process         | 0051603 | 2.4  | 3.00E-02 | <i>ISG15, KDM2A, UBR4, UBE2L6, KLHL21, NEDD8, UBR2, PSMB8, PSMB9</i>                    |
| lymphocyte activation                                              | 0046649 | 4    | 4.00E-02 | <i>NCK2, MICB, ELF4, PRKCD, SYK</i>                                                     |
| regulation of transcription from RNA polymerase II promoter        | 0006357 | 2.2  | 4.00E-02 | <i>STAT6, HHEX, SP100, ELF4, JARID2, ZHX2, MED12, SPIB, NEDD8, SUPT4H1</i>              |
| positive regulation of macromolecule metabolic process             | 0010604 | 2    | 4.00E-02 | <i>STAT6, HHEX, SP100, ELF4, MED12, PPP2R4, SUPT4H1, HMGA1, PSMB8, PSMB9, SYK</i>       |

|                                                |         |     |          |                              |
|------------------------------------------------|---------|-----|----------|------------------------------|
| immune response-activating signal transduction | 0002757 | 9.1 | 4.00E-02 | <i>MAP3K7, MICB, SYK</i>     |
| T cell activation                              | 0042110 | 5   | 4.00E-02 | <i>NCK2, MICB, ELF4, SYK</i> |

**Additional File 3: Table S3.** Ontology enrichment analysis of VL DEGs (peripheral blood). Microarray analysis from peripheral blood of 8 VL patients and 6 healthy control individuals generated 99 non-redundant differentially expressed genes (DEGs). Ontology enrichment analysis by DAVID reveals several enriched dysregulated and disease-related **(a)** KEGG pathways and **(b)** Gene Ontology (GO) biological processes.

**Running title:** VL-blood transcriptomics identifies potential novel therapeutic targets. **Dey-Rao and Sinha 2016**
