# Supplementary material for: Vitiligo blood transcriptomics provides new insights into disease mechanisms and identifies potential novel therapeutic targets
Source: PubMed Central journal article supplement (PMC5273810; doi:10.1186/s12864-017-3510-3), 2017-01-28

**Additional File 4: Figure S1.**

**Enriched canonical pathway related to immune response.** IFN alpha/beta signaling pathway is the most highly enriched canonical pathway in the 99 VL-blood DEGs. (See Figure 2) The genes from the VL-blood expression profile are down-regulated and circled in black. SHP-1 is synonymous with PTPN6. Experimental data is visualized on the maps as blue (for downregulation) and red (upregulation) histograms. The height of the histogram corresponds to the relative expression value for a particular gene/protein. Types of objects in the pathway are clarified in the legend.

**Running title:** VL-blood transcriptomics identifies potential novel therapeutic targets. **Dey-Rao and Sinha 2016**

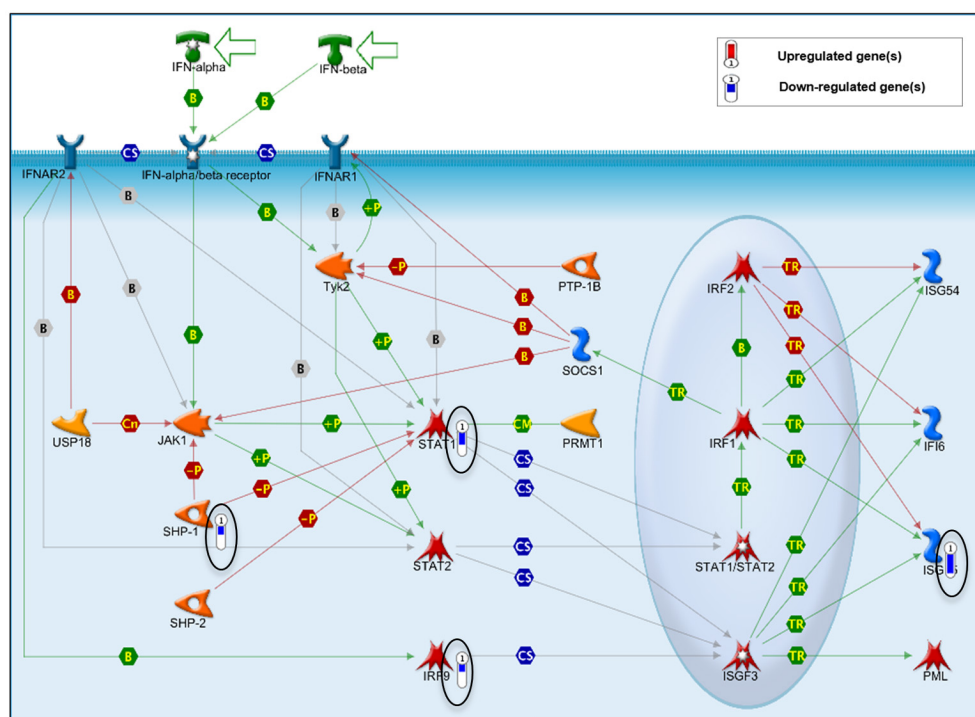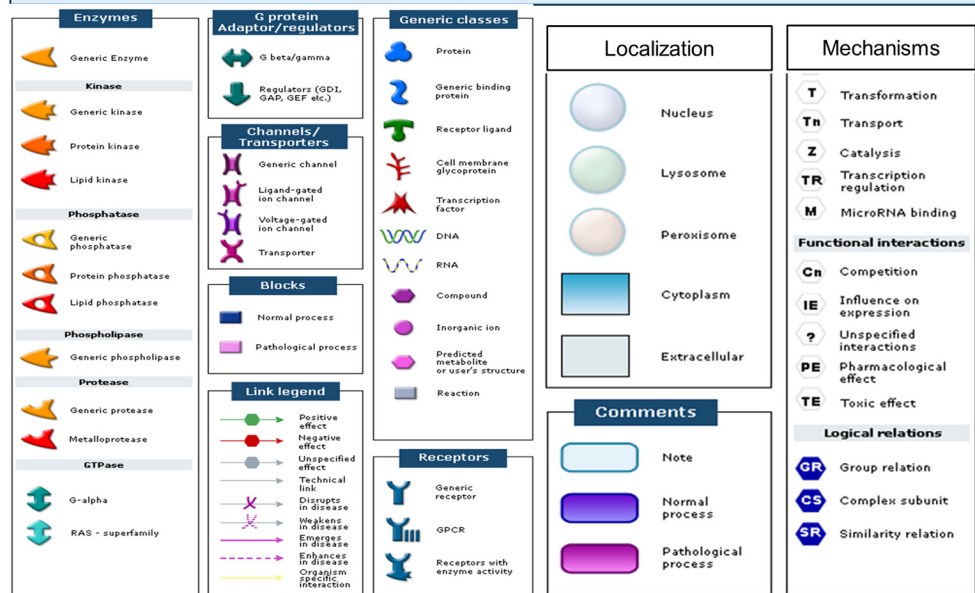

Supplement: 12864_2017_3510_MOESM4_ESM.pdf [file 12864_2017_3510_MOESM4_ESM.pdf]
