# Supplementary material for: Vitiligo blood transcriptomics provides new insights into disease mechanisms and identifies potential novel therapeutic targets
Source: PubMed Central journal article supplement (PMC5273810; doi:10.1186/s12864-017-3510-3), 2017-01-28
Supplement: 12864_2017_3510_MOESM5_ESM.pdf [file 12864_2017_3510_MOESM5_ESM.pdf]

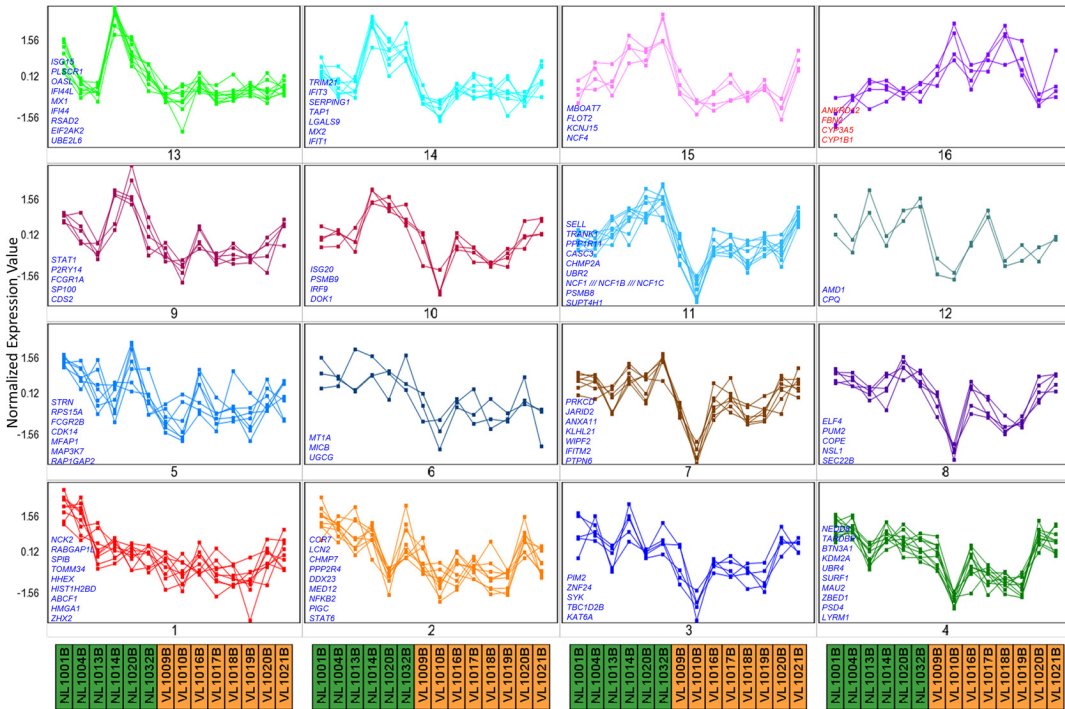

Additional File 5: Figure S2.

**Profile trellis: VL-blood associated DEGs.**

To study gene expression patterns of 99 DEGs in all samples, we visualized GCRMA processed, normalized expression values (standardized-shift rows to mean of zero and scaled to standard deviation of one) of each dysregulated genes associated with VL-blood transcriptional profile. We created self-organizing maps where clustering is performed on rows and the number of clusters is equal to the imposed map height and width of 4 X 4 with 20,000 training iterations. Fifteen groups showed the expected net down-regulation of 95 genes (blue) and 1 group with 4 genes showed an overall upregulation (red) in vitiligo patients (orange) as opposed to healthy controls (green).

**Running title:** VL-blood transcriptomics identifies potential novel therapeutic targets. Dey-Rao and Sinha 2016
