# Supplementary material for: Vitiligo blood transcriptomics provides new insights into disease mechanisms and identifies potential novel therapeutic targets
Source: PubMed Central journal article supplement (PMC5273810; doi:10.1186/s12864-017-3510-3), 2017-01-28
Supplement: 12864_2017_3510_MOESM7_ESM.pdf [file 12864_2017_3510_MOESM7_ESM.pdf]

| <b>a</b> |                               | <b>Complete database</b> | <b>Experiment(s)</b> | <b>Experiment(s) only</b> |
|----------|-------------------------------|--------------------------|----------------------|---------------------------|
|          | <b>Degree</b>                 | 22.41                    | 64.93                | 1.333                     |
|          | <b>Degree-in</b>              | 11.21                    | 25.95                | 0.6667                    |
|          | <b>Degree-out</b>             | 11.21                    | 38.98                | 0.6667                    |
|          | <b>Clustering coefficient</b> | 0.07351                  | 0.09235              | 0.07107                   |

| <b>b</b> |    | <b>IDs in active data set</b> | <b>Object name</b>    | <b>Actual</b> | <b>n</b>   | <b>R</b>   | <b>N</b>     | <b>E</b>      | <b>Ratio</b> | <b>z-score</b> | <b>p-value</b>  |
|----------|----|-------------------------------|-----------------------|---------------|------------|------------|--------------|---------------|--------------|----------------|-----------------|
|          | 1  |                               | IRF1                  | 16            | 102        | 199        | 26494        | 0.7661        | 20.88        | 17.5           | 6E-17           |
|          | 2  | <b>STAT1</b>                  | <b>STAT1</b>          | <b>17</b>     | <b>102</b> | <b>332</b> | <b>26494</b> | <b>1.2782</b> | <b>13.30</b> | <b>14.0</b>    | <b>1.13E-14</b> |
|          | 3  |                               | IRF4                  | 15            | 102        | 429        | 26494        | 1.6516        | 9.08         | 10.5           | 1.05E-10        |
|          | 4  |                               | STAT2                 | 8             | 102        | 68         | 26494        | 0.2618        | 30.56        | 15.2           | 2.23E-10        |
|          | 5  | <b>IRF9</b>                   | <b>IRF9</b>           | <b>5</b>      | <b>102</b> | <b>20</b>  | <b>26494</b> | <b>0.0770</b> | <b>64.94</b> | <b>17.8</b>    | <b>1.13E-08</b> |
|          | 6  |                               | PU.1                  | 12            | 102        | 376        | 26494        | 1.4476        | 8.29         | 8.9            | 2.41E-08        |
|          | 7  |                               | IRF2                  | 6             | 102        | 73         | 26494        | 0.2810        | 21.35        | 10.8           | 3.88E-07        |
|          | 8  |                               | IRF8                  | 9             | 102        | 250        | 26494        | 0.9625        | 9.35         | 8.2            | 5.48E-07        |
|          | 9  |                               | MYC (c-Myc)           | 26            | 102        | 2431       | 26494        | 9.3592        | 2.78         | 5.7            | 1.17E-06        |
|          | 10 |                               | c-Rel (NF-kB subunit) | 8             | 102        | 208        | 26494        | 0.8008        | 9.99         | 8.1            | 1.47E-06        |

**Additional File 7: Table S5. Interactome topology and over-connected genes.** We annotated the VL-peripheral blood profile and subjected it to interactome analysis: **(a) Interactome topology:** The experimental VL-blood dataset shows connectivity (coming in and going out) to objects in the metabase with a higher clustering coefficient (0.09235) than either, only among objects within the entire metabase (0.07351) or VL- blood profile (0.07107). **(b) Interactions of transcription factors (TFs).** The top 10 TFs show significant over-connections to other objects in the experimental VL- blood dataset as well as the larger metabase that exceed the expected number, and are accompanied by low p-values and high z-scores. The two VL-blood TFs (**bold**) with significant over-connections are **IRF9 and STAT1**. Although, the remaining eight TFs are not found in the experimental VL-blood dataset, they are significantly over-connected with objects within the dataset (actual) as well as in the metabase (R) and sorted by p-value.

Explanation of each column and row:

**A)** Degree: average number of interactions per node; Degree in: average number of ingoing interactions per node; Degree-out: average number of outgoing interactions per node; Clustering coefficient: average clustering coefficient for node; Complete database: calculated for the complete database or background list; Experiment(s): calculated for the complete database; average is calculated for the experimental set; Experiment(s) only: calculated for the experimental set (zero values in this column means that there is no interactions between objects from experimental set).

**B)** IDs in active data sets: gene symbol associated with the VL-blood transcriptional profile; Object Name: network objects (transcription factors) in metabase; Actual: Actual number of network objects in the activated dataset which interact with the chosen object; n: number of network objects in the activated dataset; R: number of network objects in the complete database or background list which interact with the chosen object; N: total number of objects in the background list; E: Expected mean of hypergeometric distribution ( $n \cdot R / N$ ); Ratio: connectivity ratio (Actual/Expected); z-score:  $(\text{Actual} - \text{Expected}) / (\text{standard deviation})$ ; p-value: probability to have the given value of Actual or higher by chance under null hypothesis of over-connectivity.

**Running title:** VL-blood transcriptomics identifies potential novel therapeutic targets. **Dey-Rao and Sinha 2016**
