# Supplementary material for: Vitiligo blood transcriptomics provides new insights into disease mechanisms and identifies potential novel therapeutic targets
Source: PubMed Central journal article supplement (PMC5273810; doi:10.1186/s12864-017-3510-3), 2017-01-28
Supplement: 12864_2017_3510_MOESM8_ESM.pdf [file 12864_2017_3510_MOESM8_ESM.pdf]

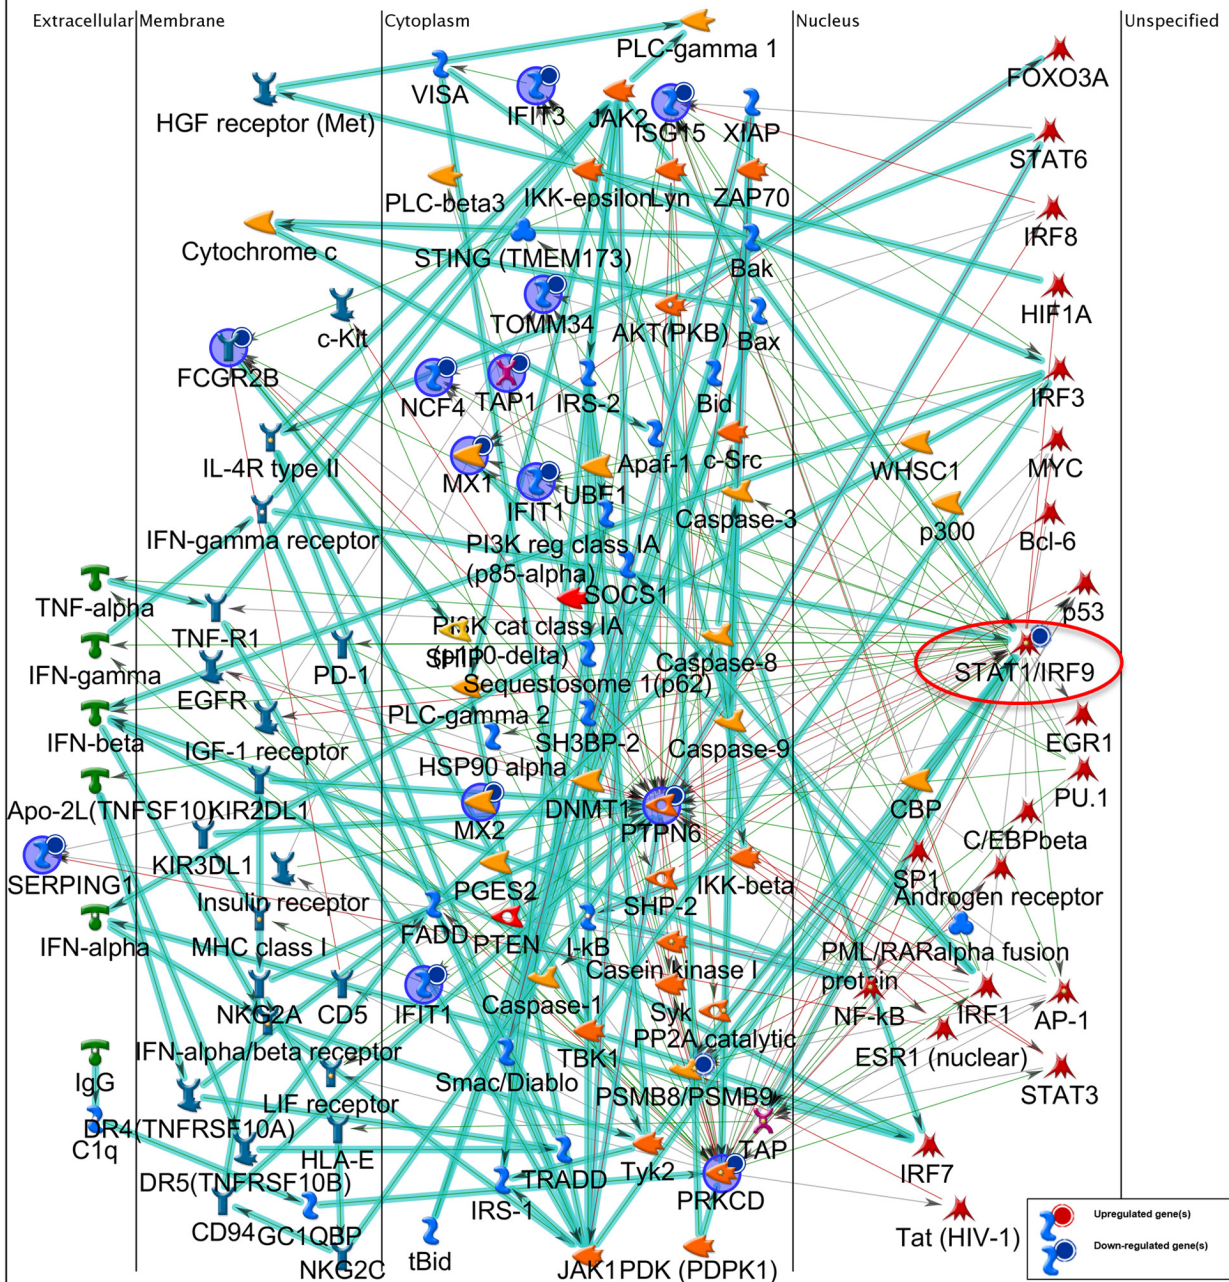

**Additional File 8 Figure S3. Network analysis of sixteen “over-connected” genes.** Sixteen genes were found to be “over-connected” by function in the VL-blood transcriptional profile (13 down-regulated genes form seed nodes, encircled in blue). Of the “over-connected molecules, STAT1/IRF9 and PSMB8/PSMB9 mapped to protein complexes and as such, while not embedded inside blue circles, represent seed nodes as well. Networks were generated using the shortest path algorithm and expanded by 2 objects. STAT1/IRF9 (red circle) form a central hub of incoming and outgoing (direction of arrowheads), positive green lines) and negative (red lines) interactions including portions of several canonical pathways (represented by thick cyan lines). Genes (encoding proteins) have been ordered according to their cellular localization.. For legend see Figure 4.
