# Supplementary material for: Vitiligo blood transcriptomics provides new insights into disease mechanisms and identifies potential novel therapeutic targets
Source: PubMed Central journal article supplement (PMC5273810; doi:10.1186/s12864-017-3510-3), 2017-01-28
Supplement: 12864_2017_3510_MOESM10_ESM.pdf [file 12864_2017_3510_MOESM10_ESM.pdf]

| #            | IDs in active data set | Gene Title                                                                                                                                  | IDs of corresponding network object from Network | Gene Title                                                                |
|--------------|------------------------|---------------------------------------------------------------------------------------------------------------------------------------------|--------------------------------------------------|---------------------------------------------------------------------------|
| 1            | EIF2AK2                | eukaryotic translation initiation factor 2-alpha kinase 2                                                                                   | IRF9                                             | interferon regulatory factor 9                                            |
|              |                        |                                                                                                                                             | ISG15                                            | ISG15 ubiquitin-like modifier                                             |
|              |                        |                                                                                                                                             | <b>STAT1</b>                                     | signal transducer and activator of transcription 1, 91kDa                 |
| 2            | IFIT1                  | interferon-induced protein with tetratricopeptide repeats 1                                                                                 | IFIT1                                            | interferon-induced protein with tetratricopeptide repeats 1               |
|              |                        |                                                                                                                                             | IFIT3                                            | interferon-induced protein with tetratricopeptide repeats 3               |
|              |                        |                                                                                                                                             | IFIT3                                            |                                                                           |
|              |                        |                                                                                                                                             | IRF9                                             | interferon regulatory factor 9                                            |
|              |                        |                                                                                                                                             | IRF9                                             |                                                                           |
|              |                        |                                                                                                                                             | ISG15                                            | ISG15 ubiquitin-like modifier                                             |
|              |                        |                                                                                                                                             | <b>STAT1</b>                                     | ISG15 ubiquitin-like modifier                                             |
| <b>STAT1</b> |                        |                                                                                                                                             |                                                  |                                                                           |
| 3            | IFIT3                  | interferon-induced protein with tetratricopeptide repeats 3                                                                                 | IRF9                                             | interferon regulatory factor 9                                            |
|              |                        |                                                                                                                                             | ISG15                                            | ISG15 ubiquitin-like modifier                                             |
|              |                        |                                                                                                                                             | <b>STAT1</b>                                     | signal transducer and activator of transcription 1, 91kDa                 |
| 4            | IRF9                   | interferon regulatory factor 9                                                                                                              | ISG15                                            | ISG15 ubiquitin-like modifier                                             |
|              |                        |                                                                                                                                             | STAT6                                            | signal transducer and activator of transcription 6, interleukin-4 induced |
| 5            | MX1; MX2               | <i>myxovirus (influenza virus) resistance 1, interferon-inducible protein p78 (mouse); myxovirus (influenza virus) resistance 2 (mouse)</i> | ISG15                                            | <i>ISG15 ubiquitin-like modifier</i>                                      |
|              |                        |                                                                                                                                             | SP100                                            | SP100 nuclear antigen                                                     |
|              |                        |                                                                                                                                             | <b>STAT1</b>                                     | signal transducer and activator of transcription 1, 91kDa                 |
| 6            | NCF4                   | neutrophil cytosolic factor 4, 40kDa                                                                                                        | PRKCD                                            | protein kinase C, delta                                                   |

|    |              |                                                                                         |              |                                                                           |
|----|--------------|-----------------------------------------------------------------------------------------|--------------|---------------------------------------------------------------------------|
|    |              |                                                                                         | <b>STAT1</b> | signal transducer and activator of transcription 1, 91kDa                 |
| 7  | P2RY14       | purinergic receptor P2Y, G-protein coupled, 14                                          | PRKCD        | protein kinase C, delta                                                   |
| 8  | PLSCR1       | phospholipid scramblase 1                                                               | PRKCD        |                                                                           |
|    |              |                                                                                         | <b>STAT1</b> | signal transducer and activator of transcription 1, 91kDa                 |
| 9  | PSMB9        | PSMB9                                                                                   | PSMB8        | proteasome (prosome, macropain) subunit, beta type, 8                     |
| 10 | PTPN6        | protein tyrosine phosphatase, non-receptor type 6                                       | FCGR2B       | Fc fragment of IgG, low affinity IIb, receptor (CD32)                     |
|    |              |                                                                                         | PRKCD        | protein kinase C, delta                                                   |
|    |              |                                                                                         | <b>STAT1</b> | signal transducer and activator of transcription 1, 91kDa                 |
|    |              |                                                                                         | STAT6        | signal transducer and activator of transcription 6, interleukin-4 induced |
|    |              |                                                                                         | SYK          | spleen tyrosine kinase                                                    |
| 11 | SEC22B       | vesicle-trafficking protein SEC22b-like /// SEC22 vesicle trafficking protein homolog B | PRKCD        | protein kinase C, delta                                                   |
|    |              |                                                                                         | <b>STAT1</b> | signal transducer and activator of transcription 1, 91kDa                 |
| 12 | <b>STAT1</b> | signal transducer and activator of transcription 1, 91kDa                               | IRF9         | interferon regulatory factor 9                                            |
|    |              |                                                                                         | ISG15        | ISG15 ubiquitin-like modifier                                             |
|    |              |                                                                                         | PRKCD        | protein kinase C, delta                                                   |
|    |              |                                                                                         | PSMB9        | proteasome (prosome, macropain) subunit, beta type, 9                     |
|    |              |                                                                                         | SERPING1     | serpin peptidase inhibitor, clade G (C1 inhibitor), member 1              |
|    |              |                                                                                         | SP100        | SP100 nuclear antigen                                                     |
|    |              |                                                                                         | STAT6        | signal transducer and activator of transcription 6, interleukin-4 induced |
|    |              |                                                                                         | SYK          | spleen tyrosine kinase                                                    |

|    |        |                                                                           |        |                                                             |
|----|--------|---------------------------------------------------------------------------|--------|-------------------------------------------------------------|
|    |        |                                                                           | TAP1   | transporter 1, ATP-binding cassette, sub-family B (MDR/TAP) |
| 13 | STAT6  | signal transducer and activator of transcription 6, interleukin-4 induced | ISG15  | ISG15 ubiquitin-like modifier                               |
| 14 | SYK    | spleen tyrosine kinase                                                    | FCGR2B | Fc fragment of IgG, low affinity IIb, receptor (CD32)       |
| 15 | TAP1   | transporter 1, ATP-binding cassette, sub-family B (MDR/TAP)               | PRKCD  | protein kinase C, delta                                     |
|    |        |                                                                           | PSMB8  | proteasome (prosome, macropain) subunit, beta type, 8       |
|    |        |                                                                           | PSMB9  | proteasome (prosome, macropain) subunit, beta type, 9       |
| 16 | TOMM34 | translocase of outer mitochondrial membrane 34                            | SYK    | spleen tyrosine kinase                                      |
| 17 | UBE2L6 | ubiquitin-conjugating enzyme E2L 6                                        | ISG15  | ISG15 ubiquitin-like modifier                               |

**Additional File 10: Table S7. Significant paired nodes within over-connected functional genes:** We activate the annotated VL-blood dataset that includes 99 DEGs and focus on the “over-connected” genes (encoding proteins) by function (see Table 2). We identify objects that pass the FDR threshold of 0.05 in significance, to reveal pairs of key nodes within our dataset that interact with one another to regulate a larger network. The transcription factor STAT1 (**bold**) is the highest interacting partner involved in such interactions followed by PRKCD, IRF9 and ISG15.

Explanation of columns:

IDs in active data set: over-connected proteins (Gene IDs) in the activated VL-blood profile found by Interactome analysis.

Interacting IDs in active data set: over-connected proteins (Gene IDs) found by interactome analysis that act as a pair with IDs in active data set.

**Running title:** VL-blood transcriptomics identifies potential novel therapeutic targets. **Dey-Rao and Sinha 2016**
