# Supplementary material for: Vitiligo blood transcriptomics provides new insights into disease mechanisms and identifies potential novel therapeutic targets
Source: PubMed Central journal article supplement (PMC5273810; doi:10.1186/s12864-017-3510-3), 2017-01-28
Supplement: 12864_2017_3510_MOESM11_ESM.pdf [file 12864_2017_3510_MOESM11_ESM.pdf]

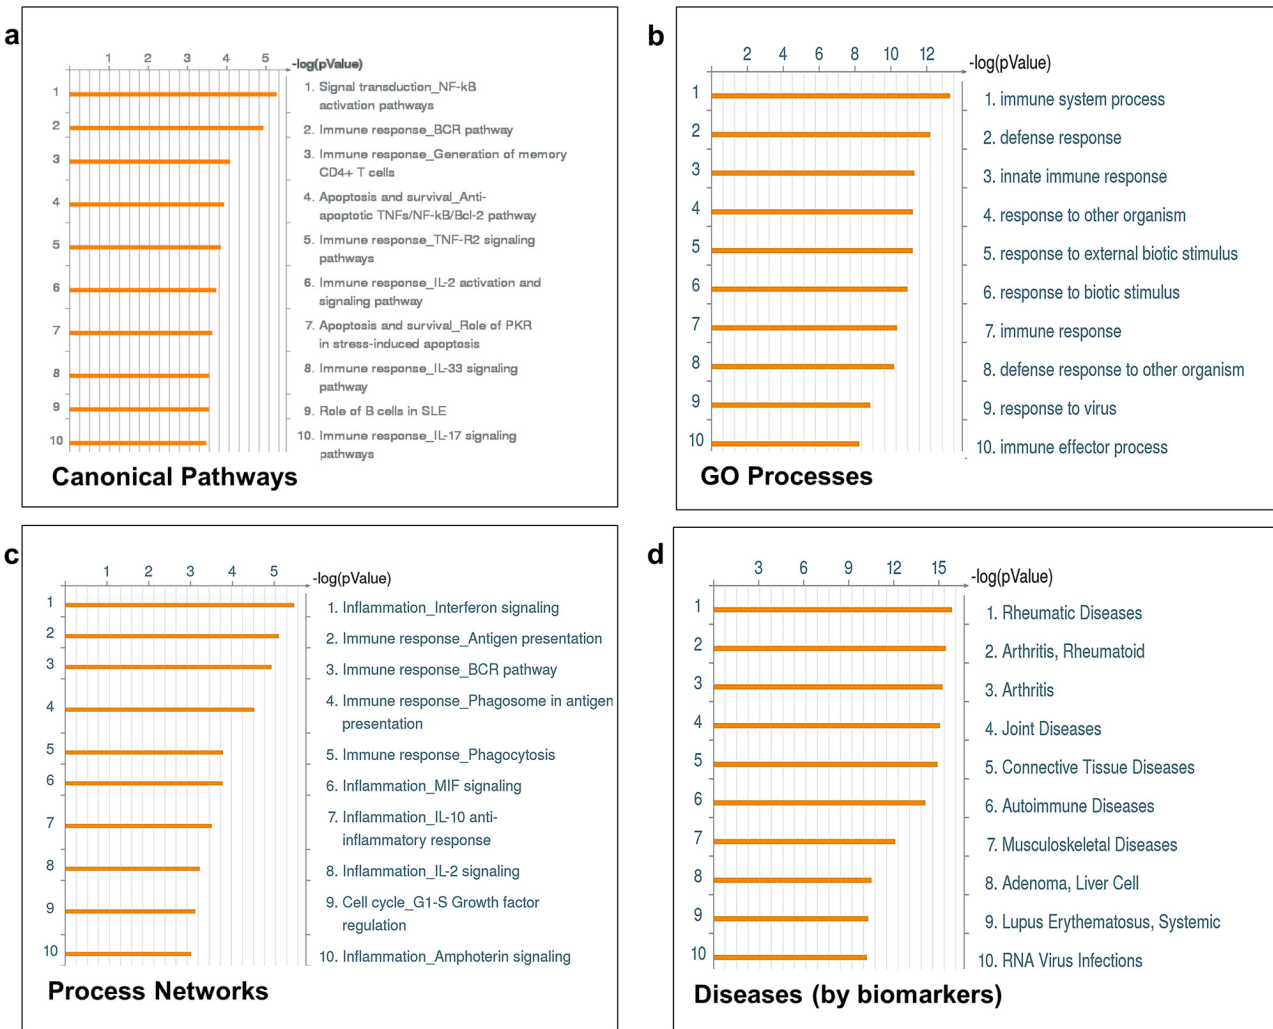

**Additional File 11: Figure S4. Ontology enrichment analysis of 35 VL-blood associated DEGs that mapped to six chromosomal “hot spots”.**

Chromosomal distribution of the genome-wide VL-blood expression dataset with 99 DEGs revealed six transcriptional “hot spots” where the DEGs mapped in significant stretches. Ontology enrichment analysis was performed on the 35 DEGs included within the 6 “hot spots”, demonstrating an over-representation in the following categories: **(a)** canonical pathways **(b)** GO processes **(c)** process networks and **(d)** diseases by biomarkers. Top ten enrichments are sorted and ranked by p-value shown on a logarithmic scale. A lower p-value indicates higher statistical significance.

**Running title:** VL-blood transcriptomics identifies potential novel therapeutic targets. **Dey-Rao and Sinha 2016**
